# Supplementary material
Source: PubMed Central journal article supplement (PMC7132784)

chr12:118725604-118725889(NCBI36/hg18)

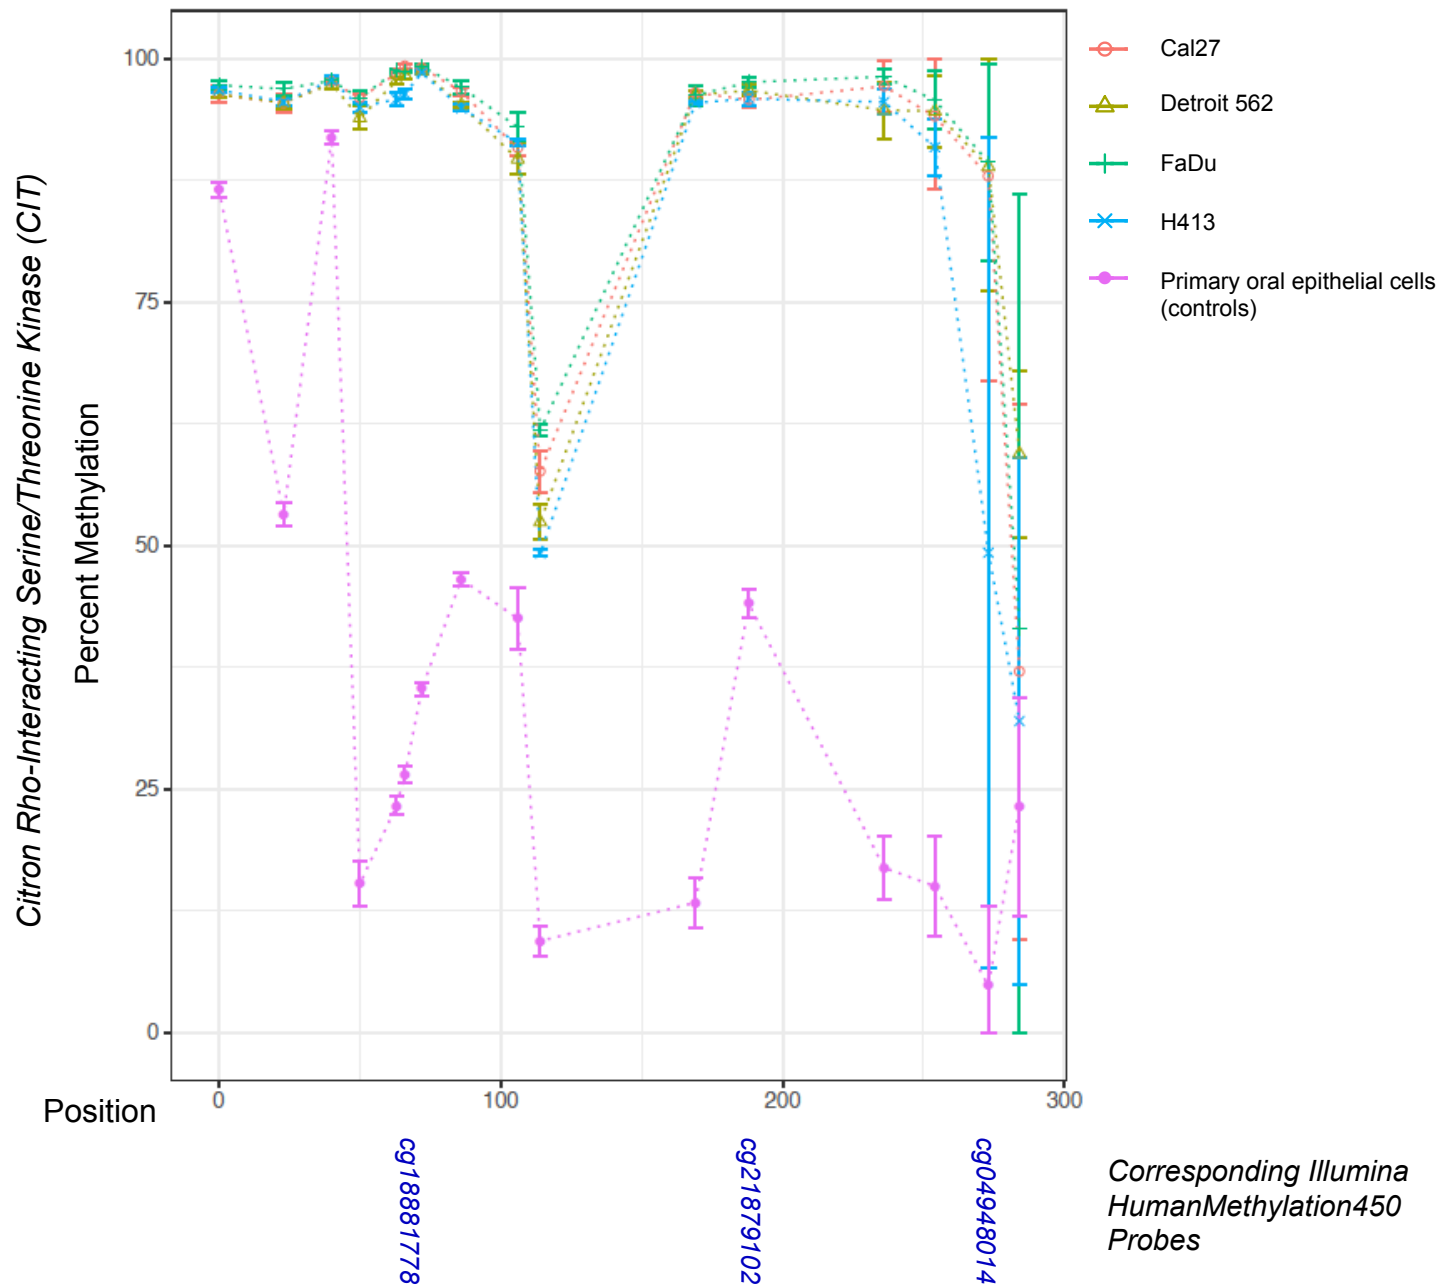

chr12:28015205–28015607(NCBI36/hg18)

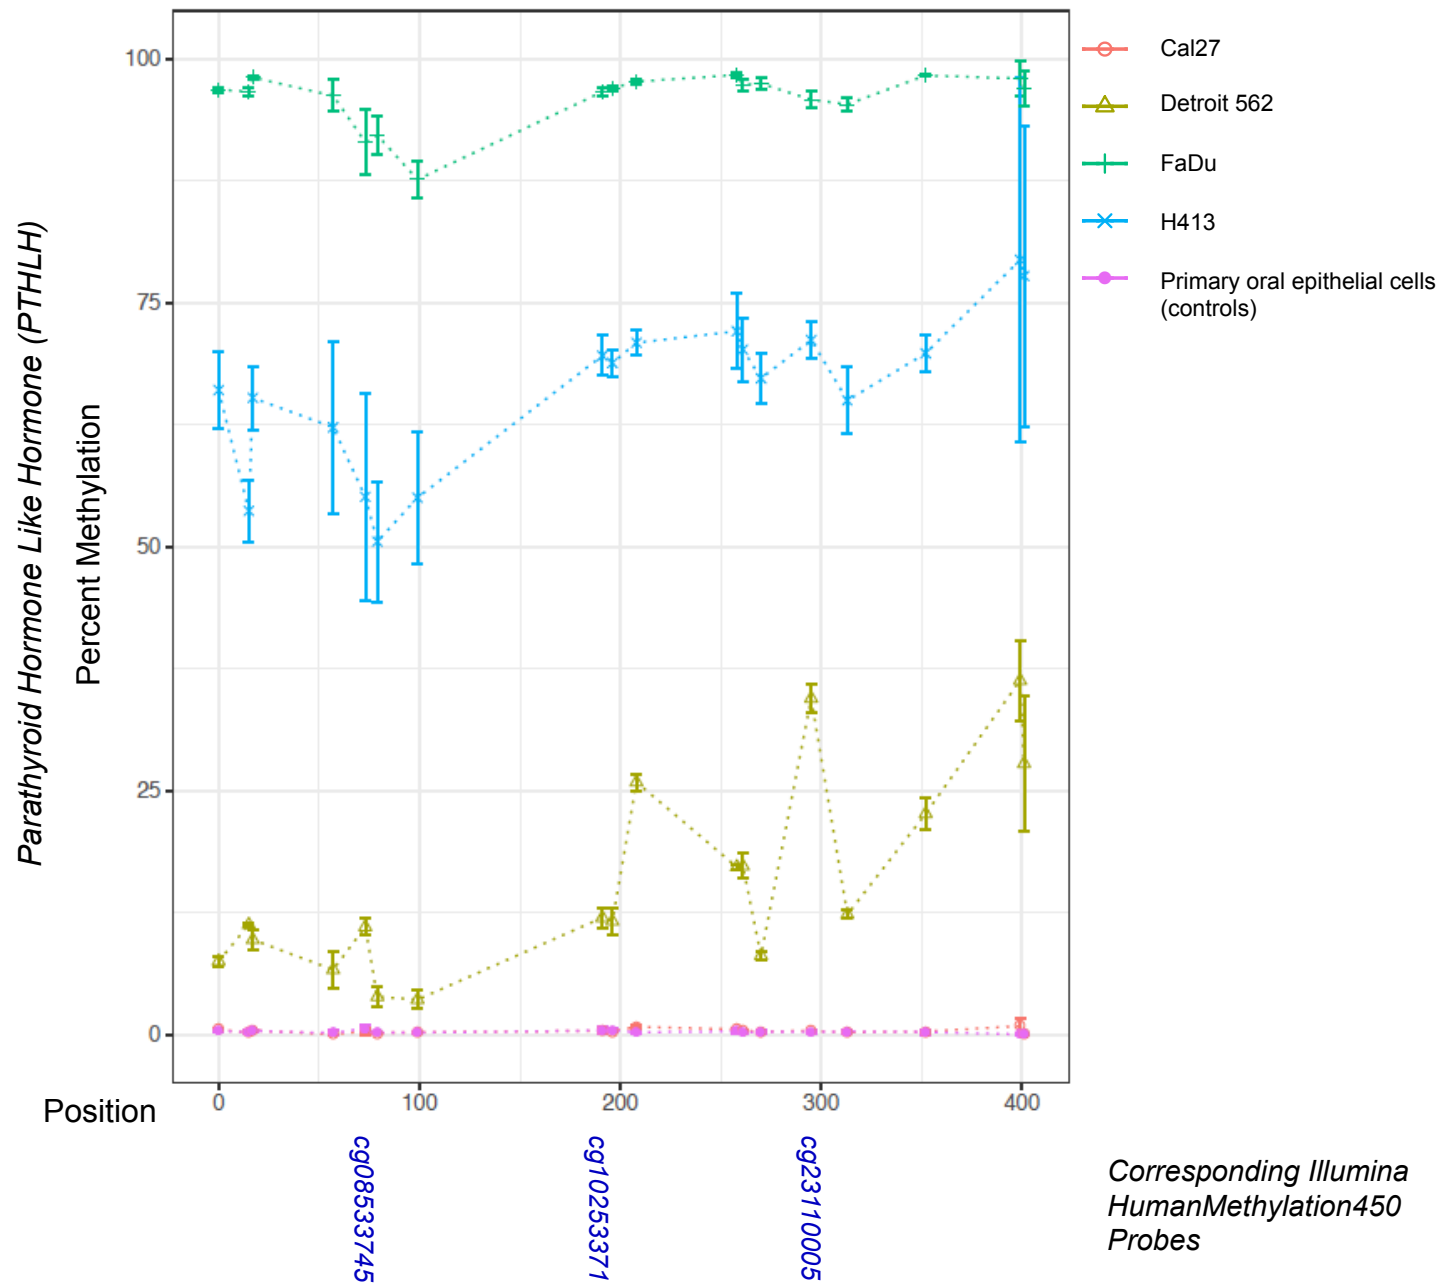

chr11:2511670-2512178(NCBI36/hg18)

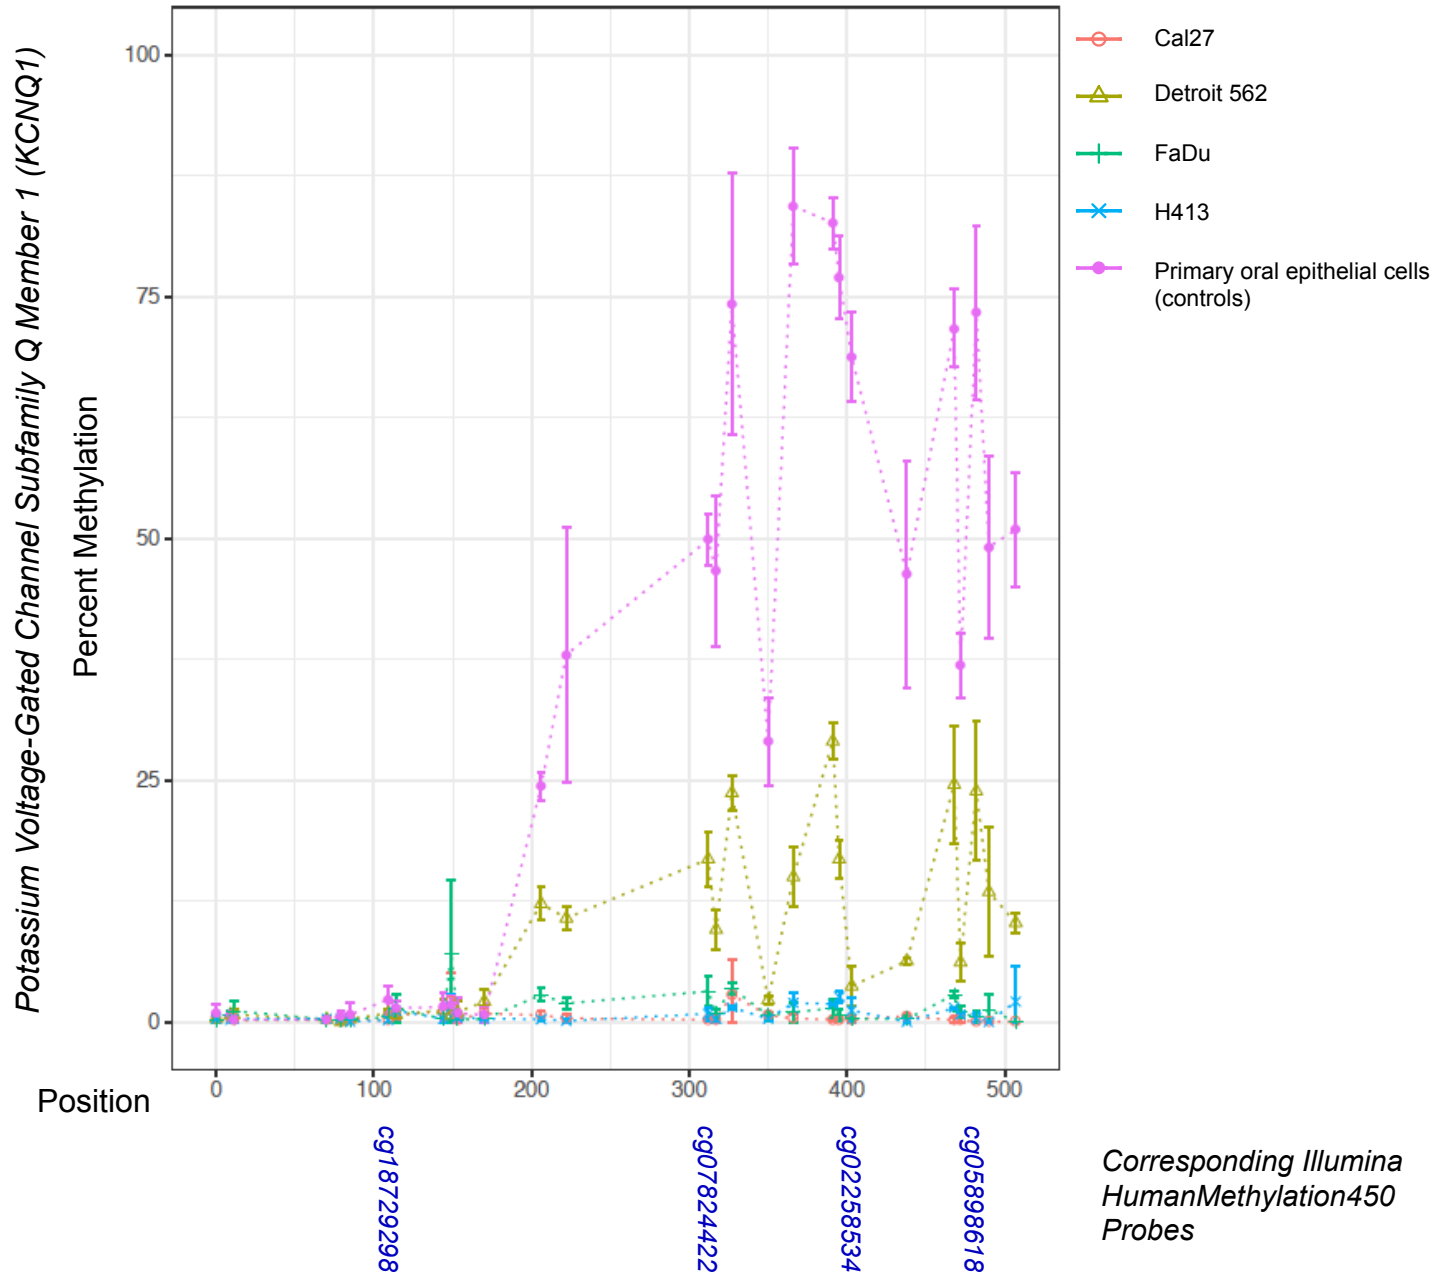

chr1:8194584–8194818(NCBI36/hg18)

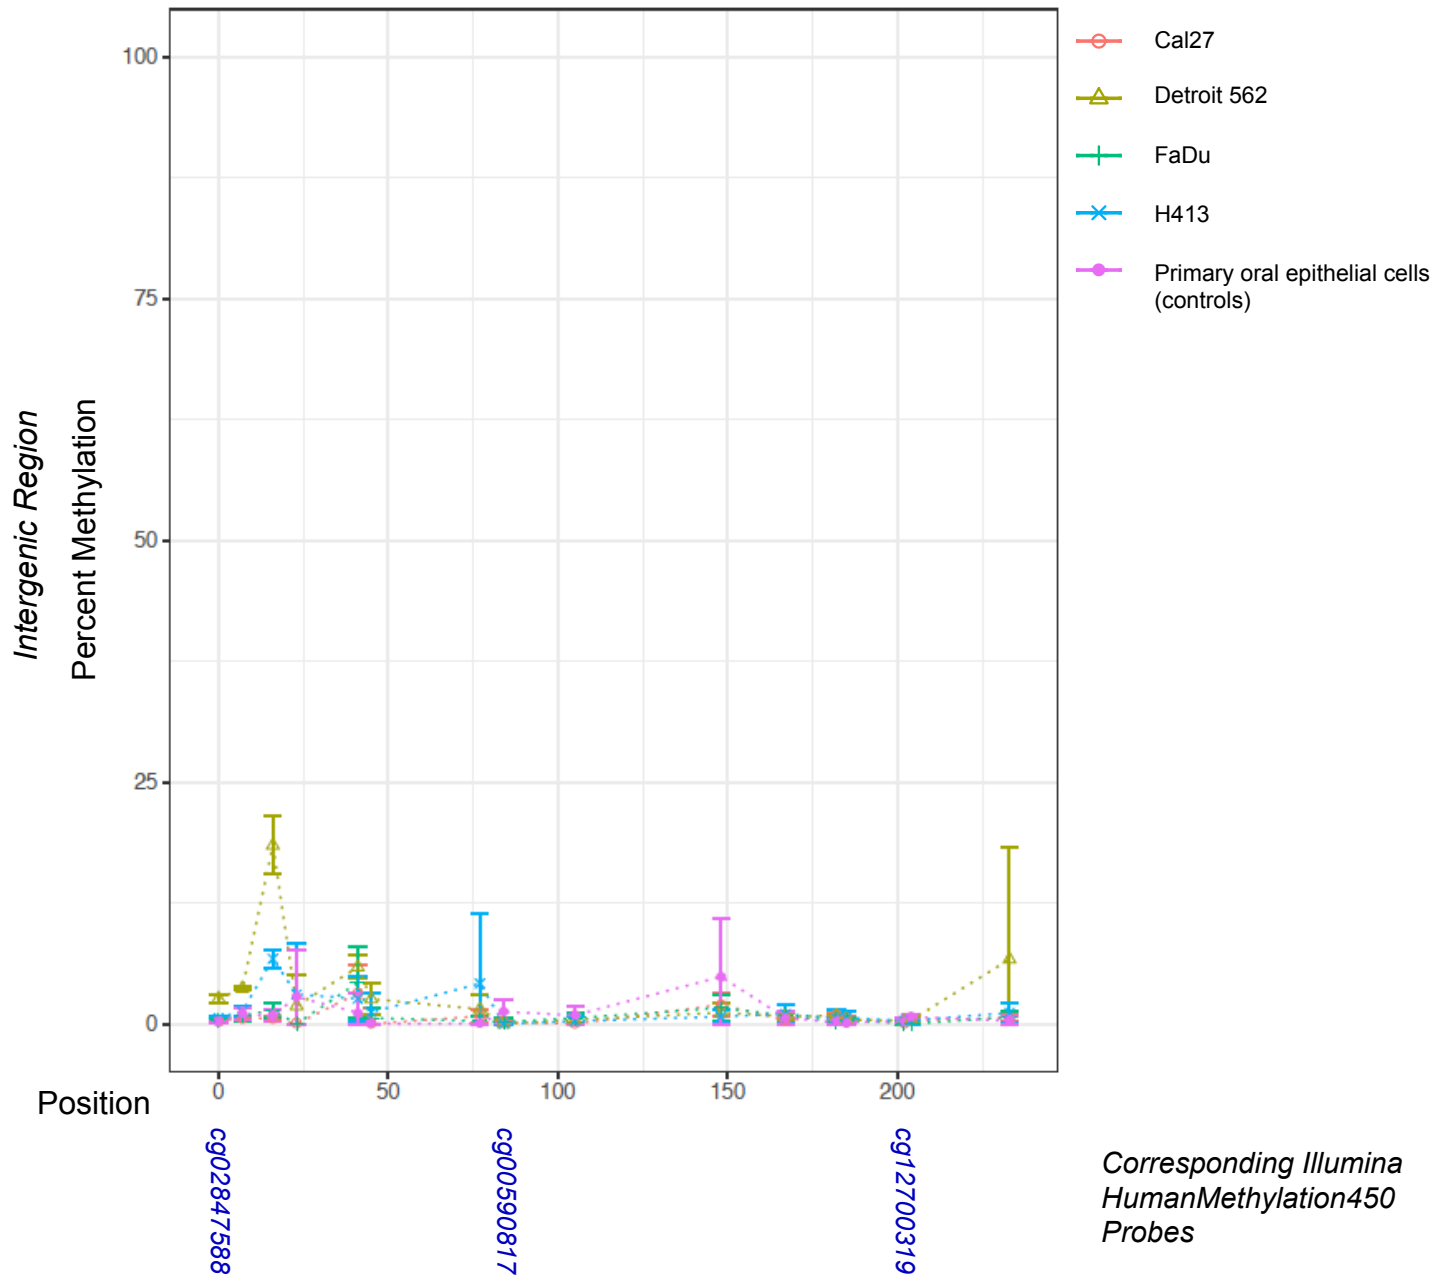

Corresponding Illumina HumanMethylation450 Probes

chr12:110319267-110319654(NCBI36/hg18)

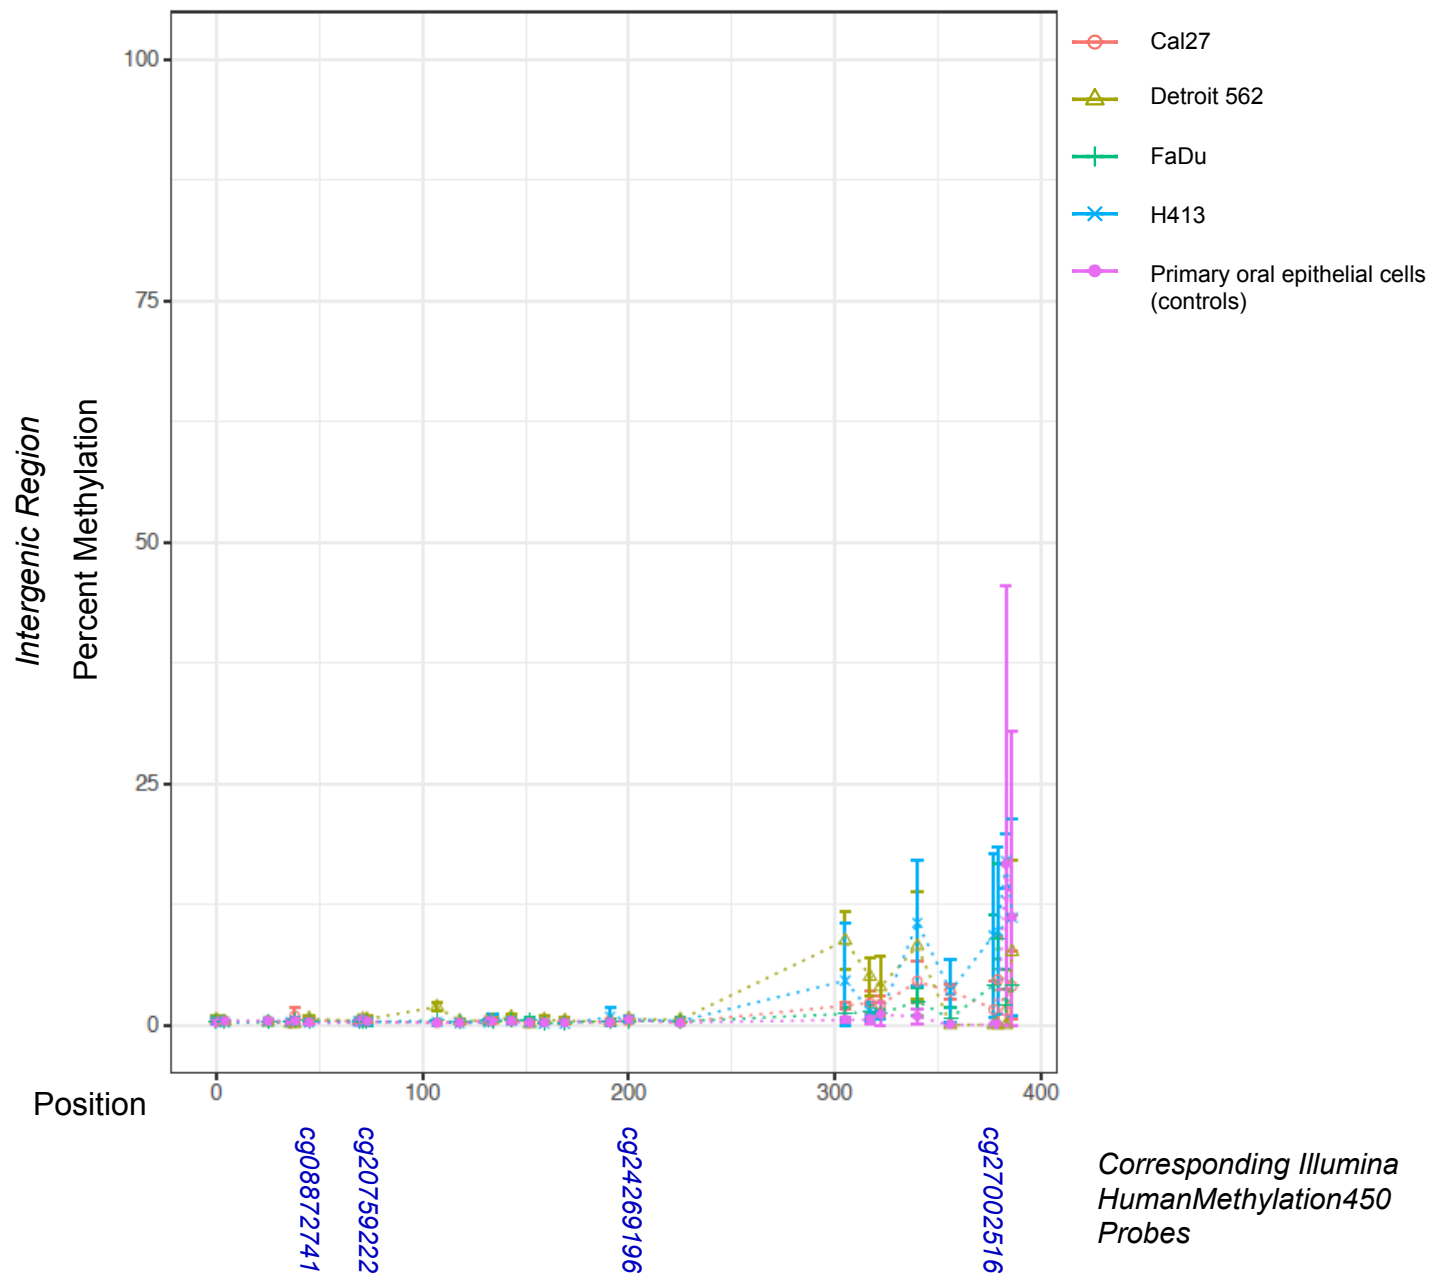

chr19:5538686-5538939(NCBI36/hg18)

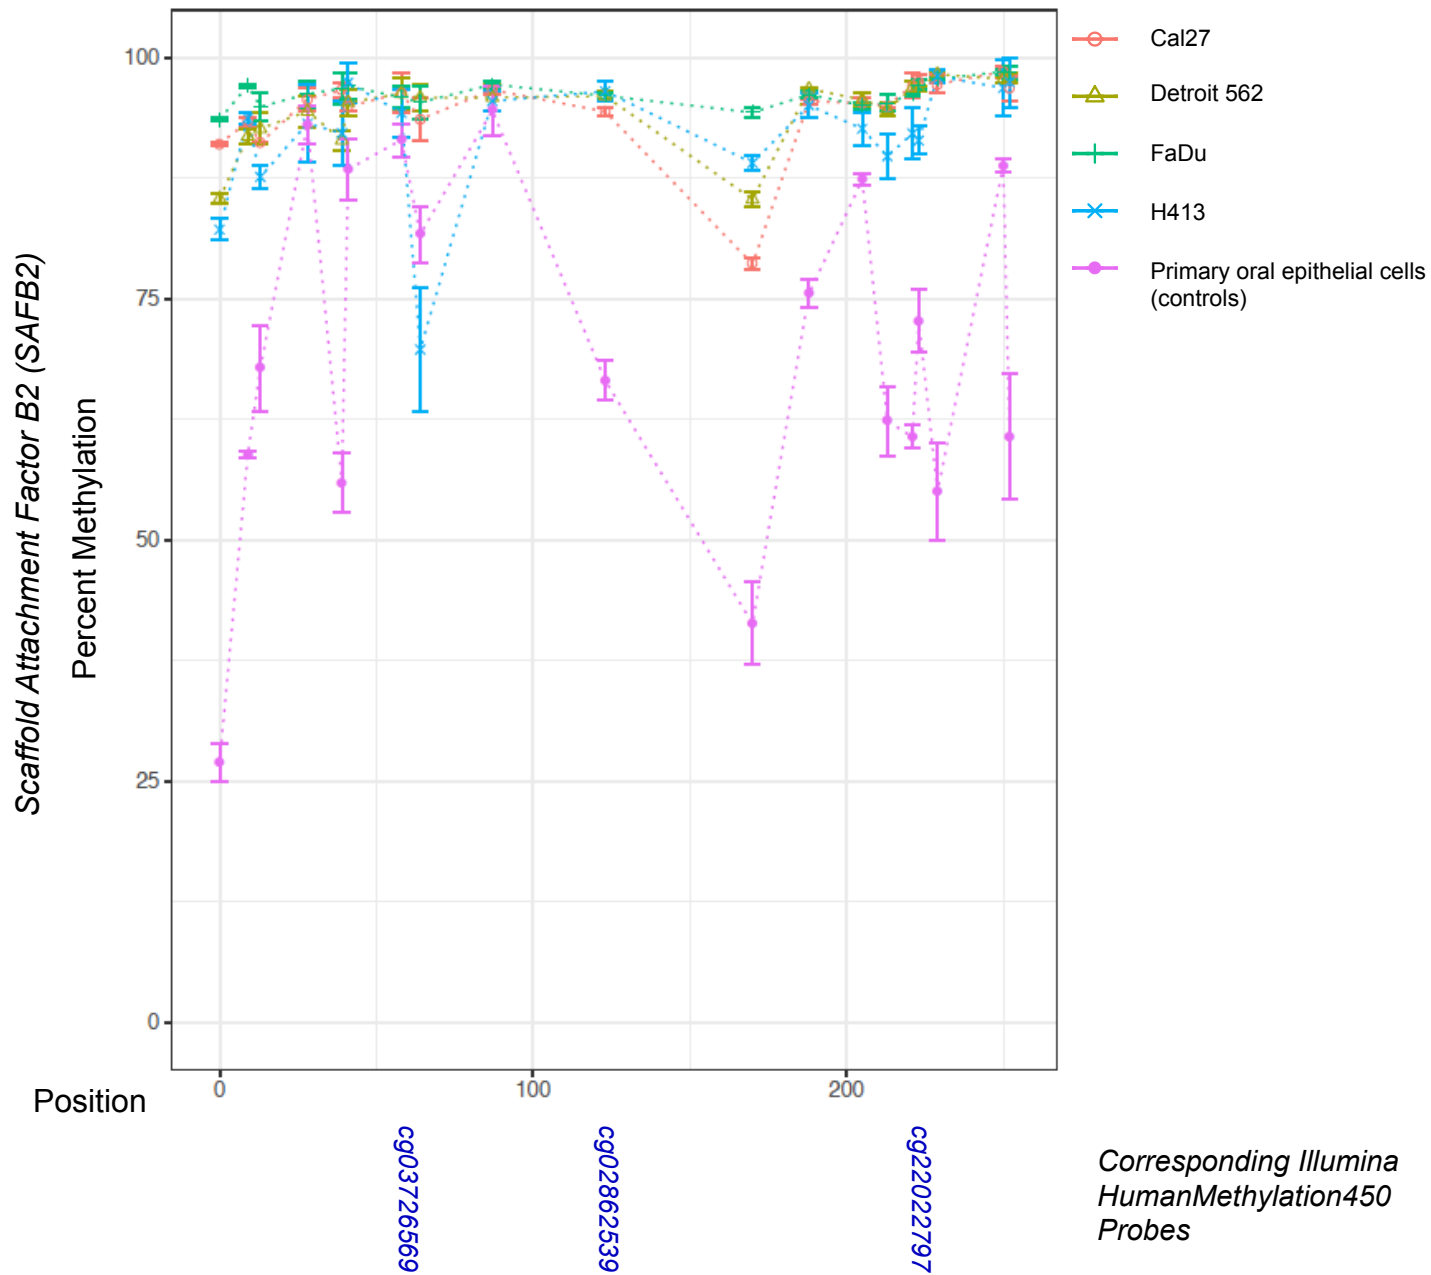

chr6:25135475-25135786(NCBI36/hg18)

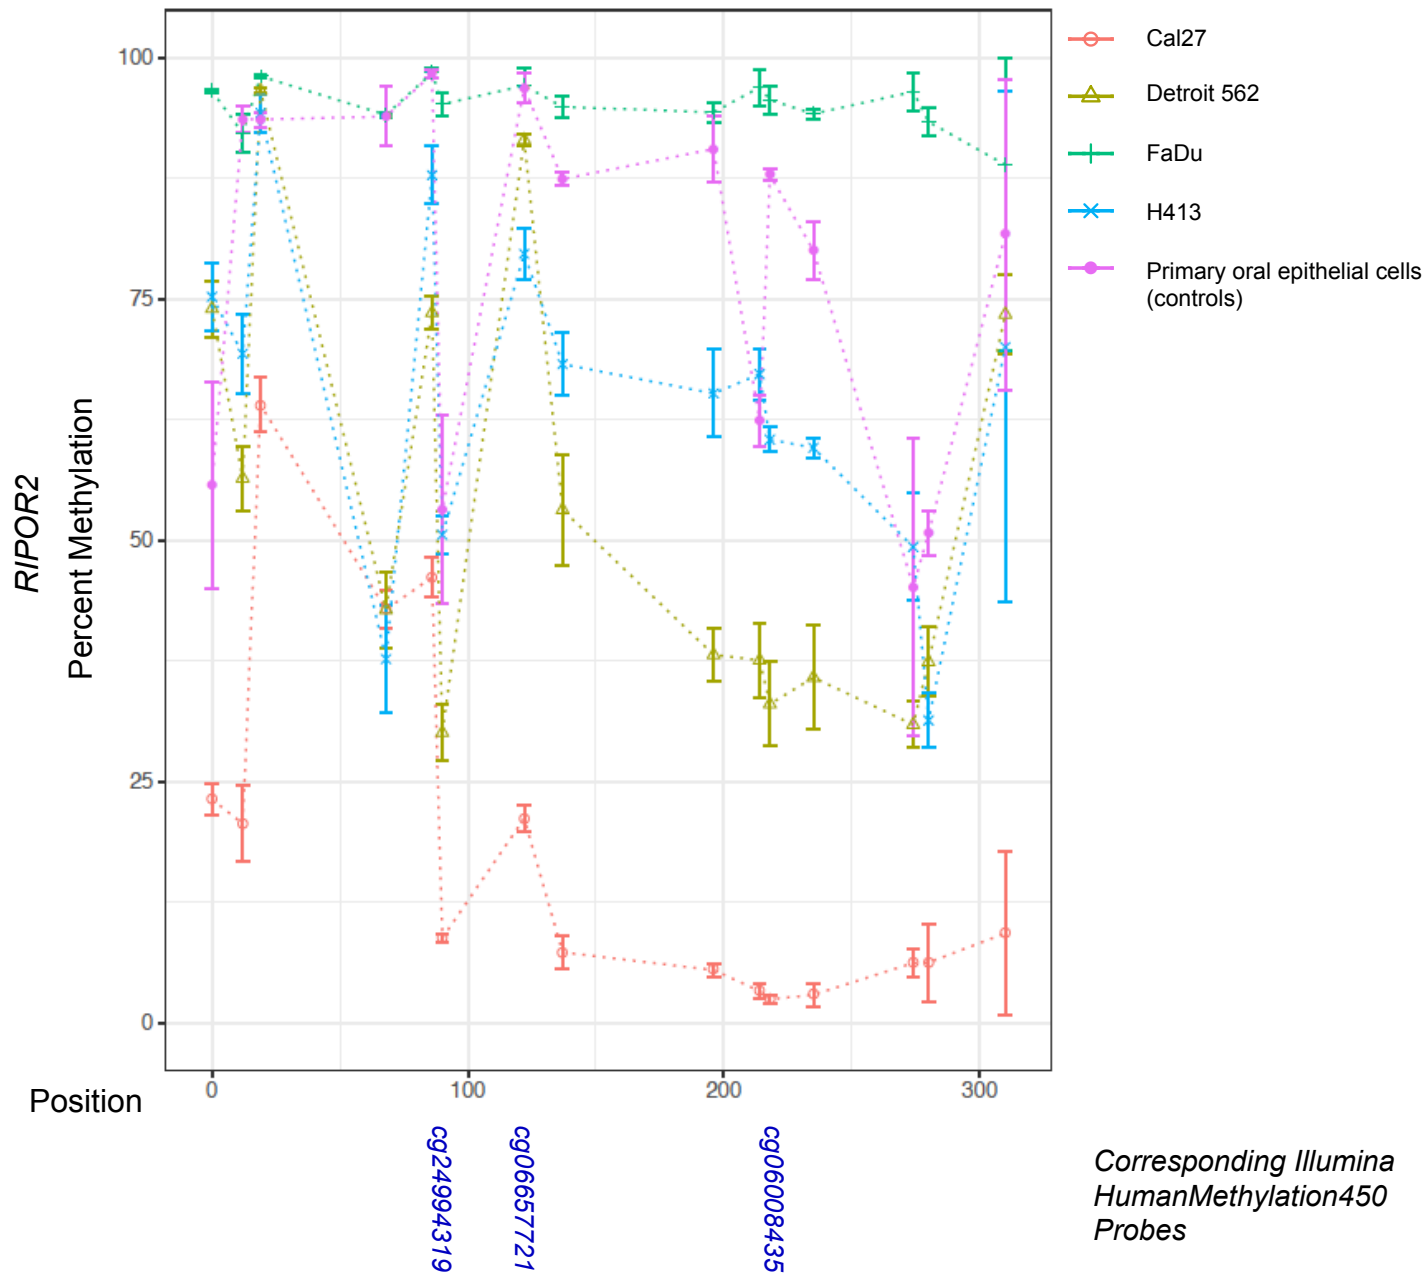

chr1:10818517-10818704(NCBI36/hg18)

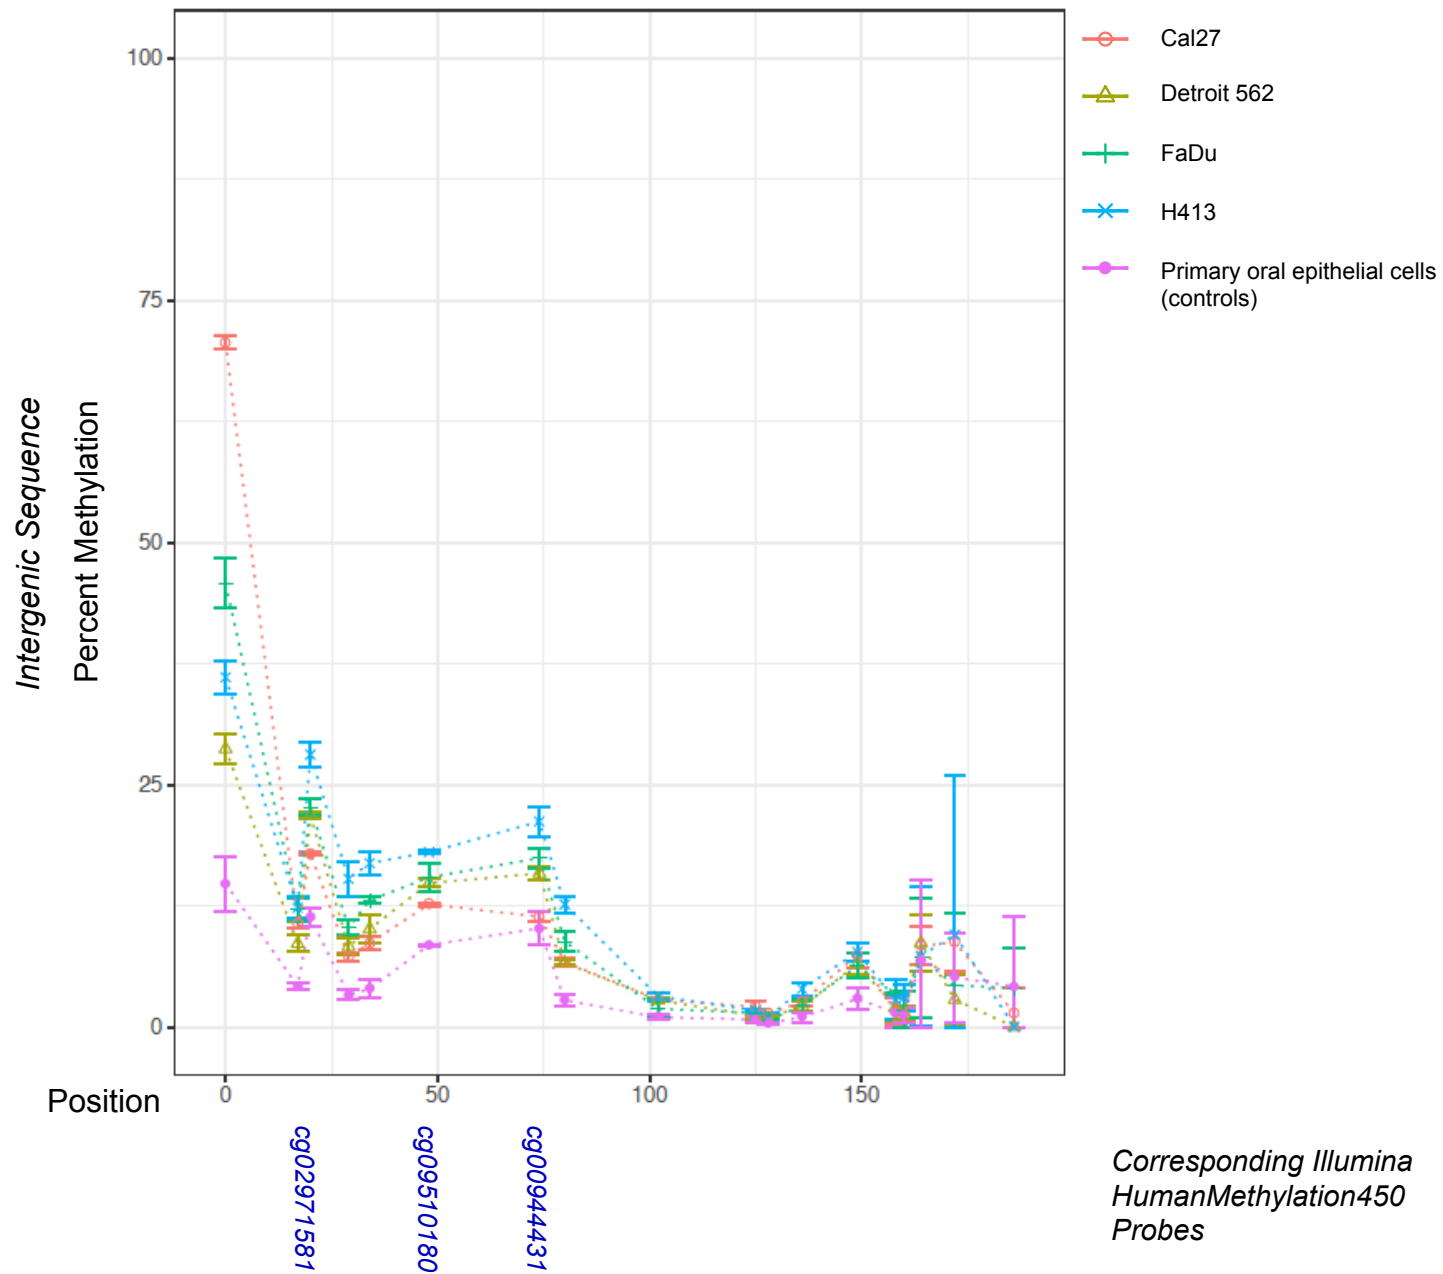



chr1:1385949-1386143(NCBI36/hg18)

ATPase Family, AAA Domain Containing 3C (ATAD3C)

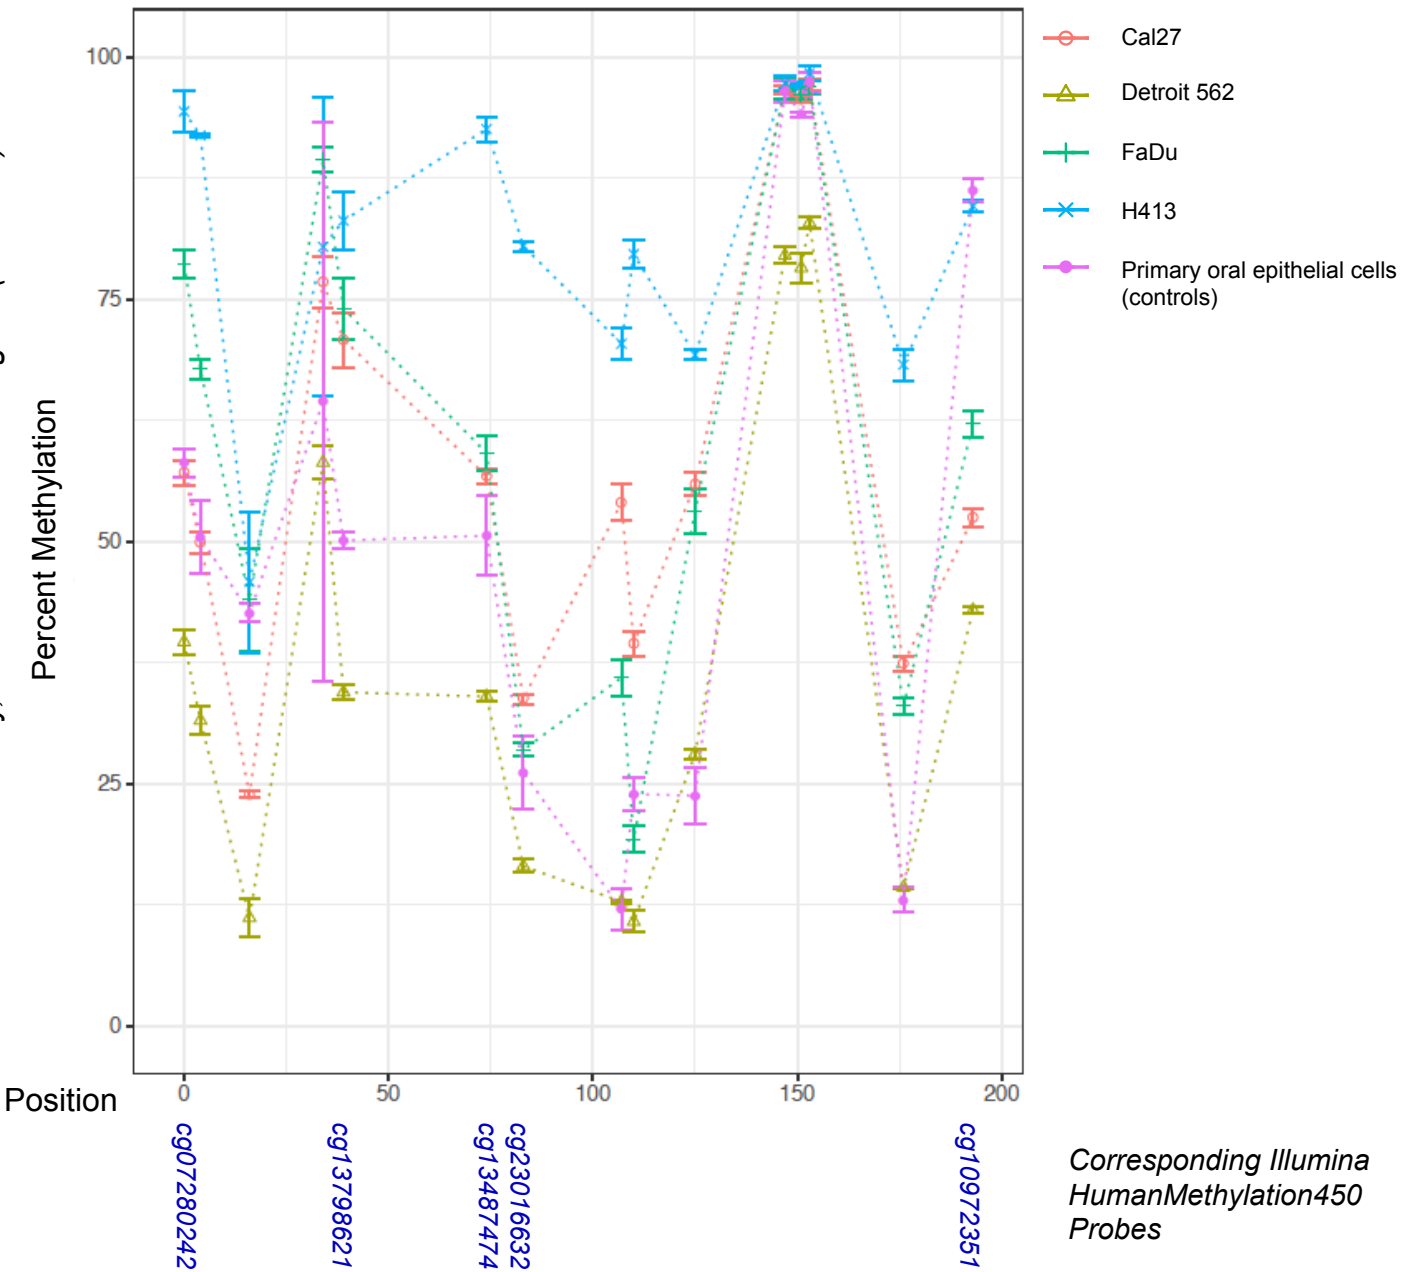

chr10:53743705-53744974(NCBI36/hg18)

*Dickkopf WNT Signaling Pathway Inhibitor 1 (DKK1)*

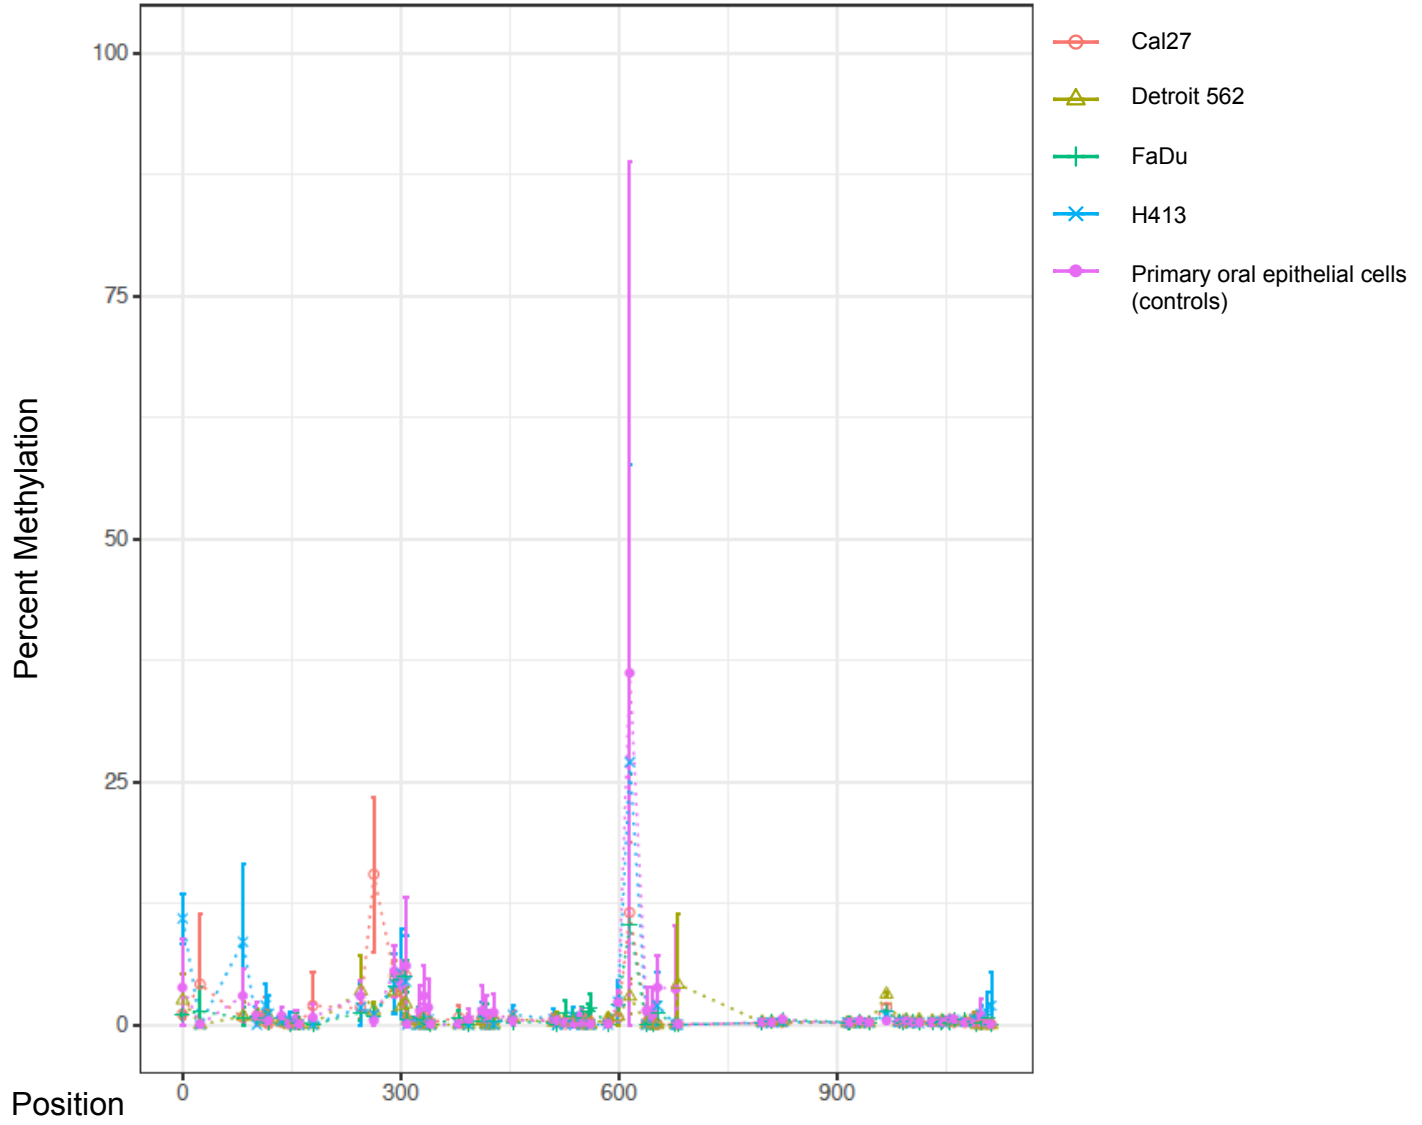

cg09445939  
cg11931116

cg07684796

cg18956393

cg08812555  
cg09465786

Corresponding Illumina  
HumanMethylation450  
Probes

chr11:20588323–20588561(NCBI36/hg18)

*Solute Carrier Family 6 Member 5 (SLC6A5)*

Percent Methylation

Position

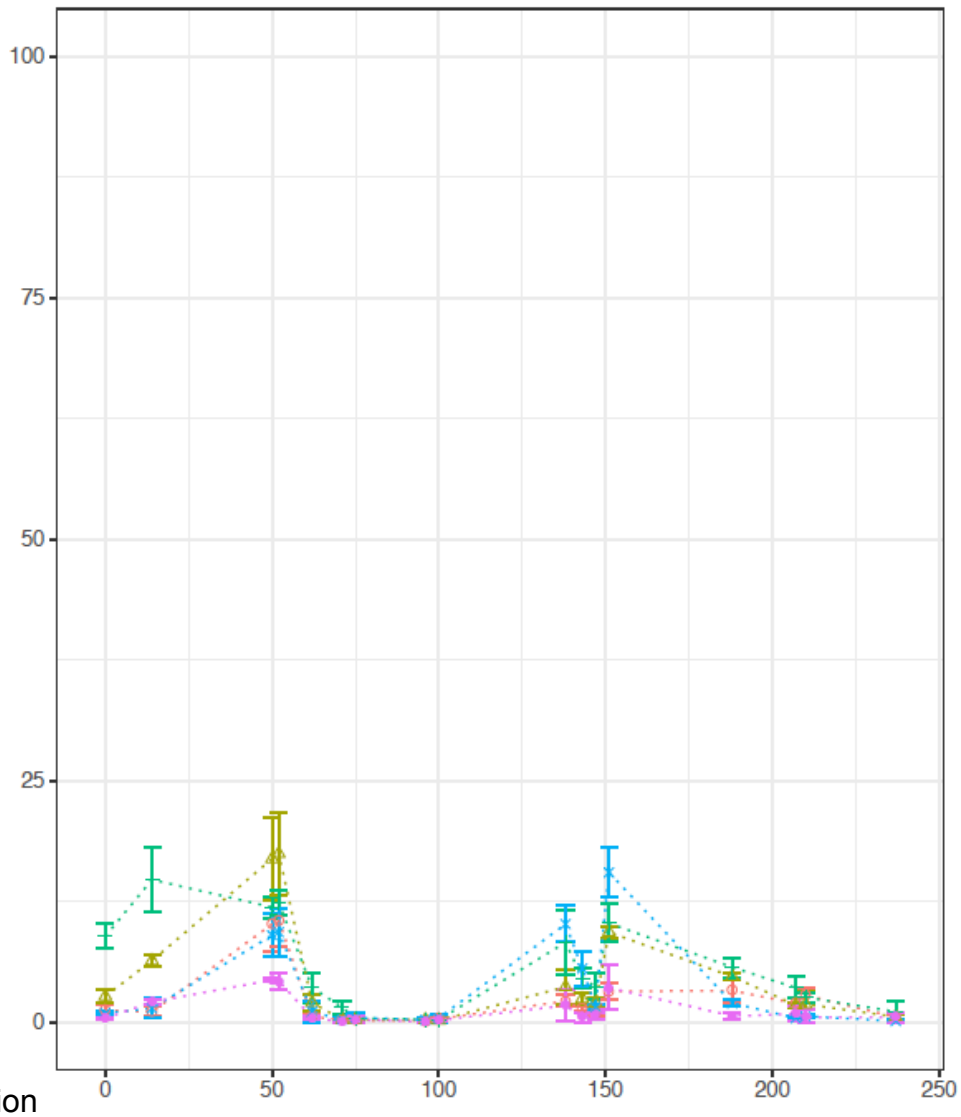

- Cal27
- Detroit 562
- FaDu
- H413
- Primary oral epithelial cells (controls)

*Corresponding Illumina HumanMethylation450 Probes*

chr10:134210902-134211265(NCBI36/hg18)

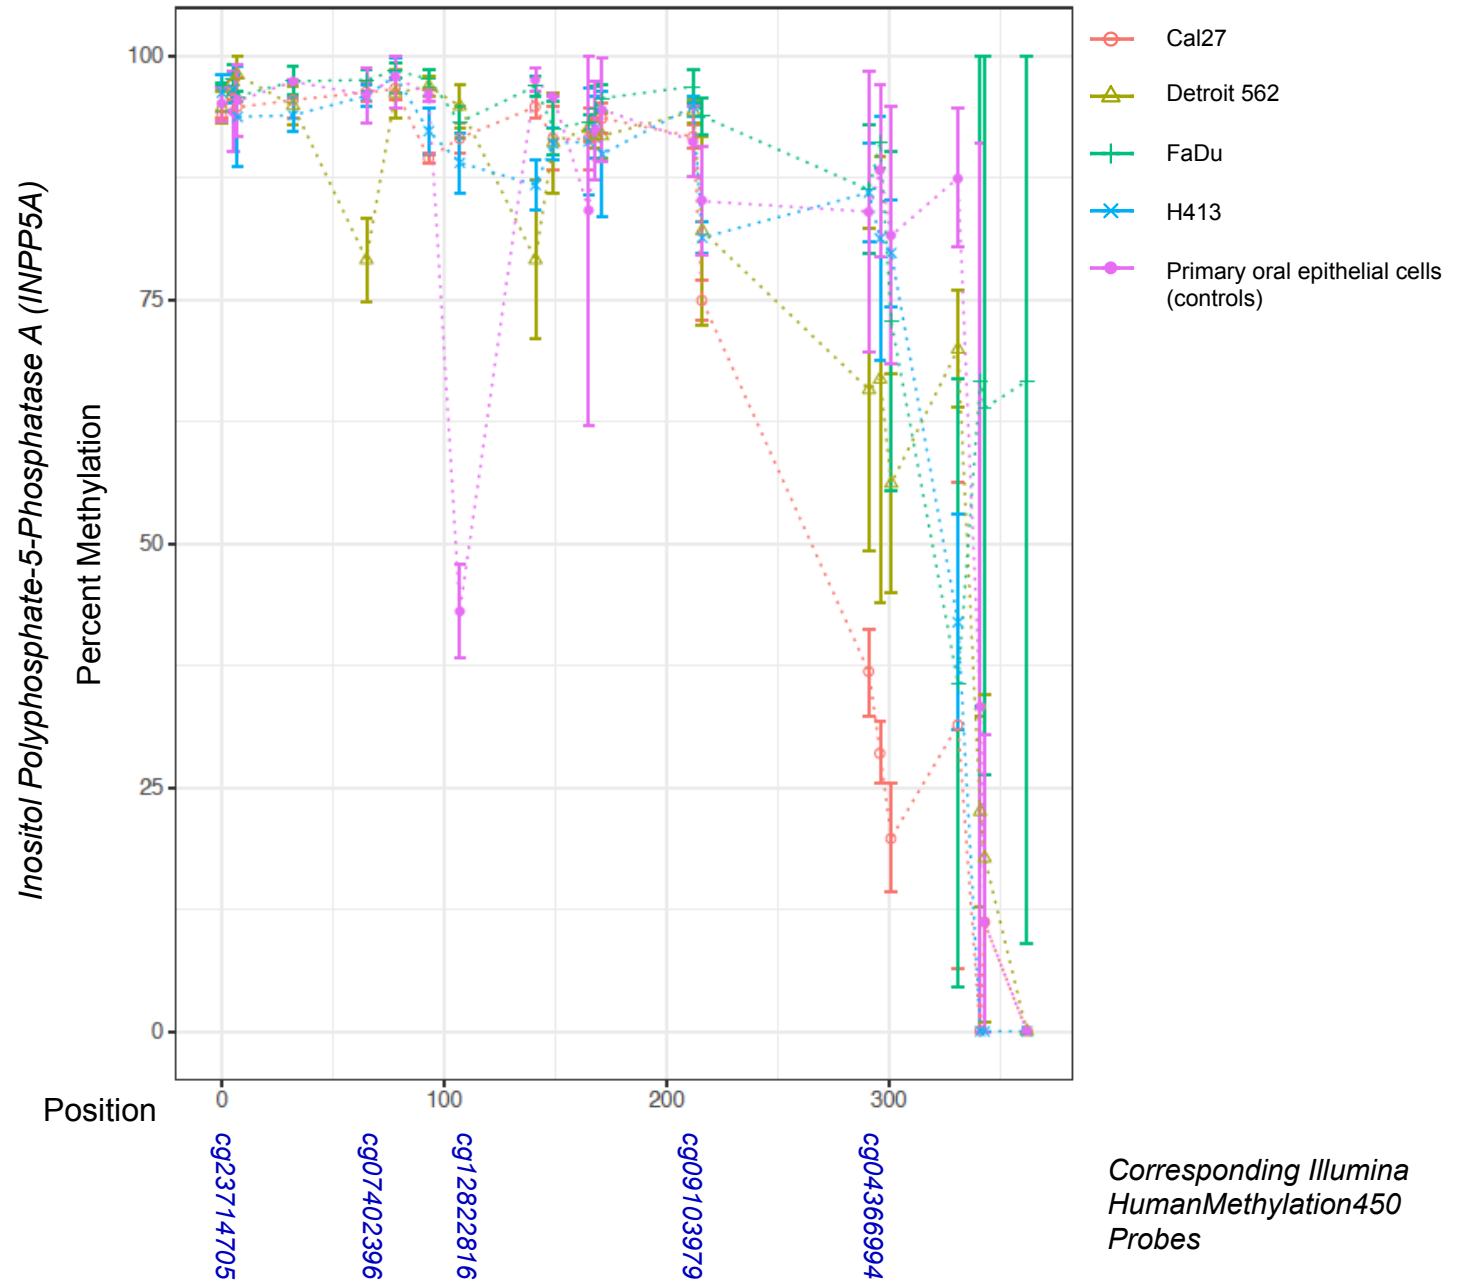

chr5:10702368-10703458(NCBI36/hg18)

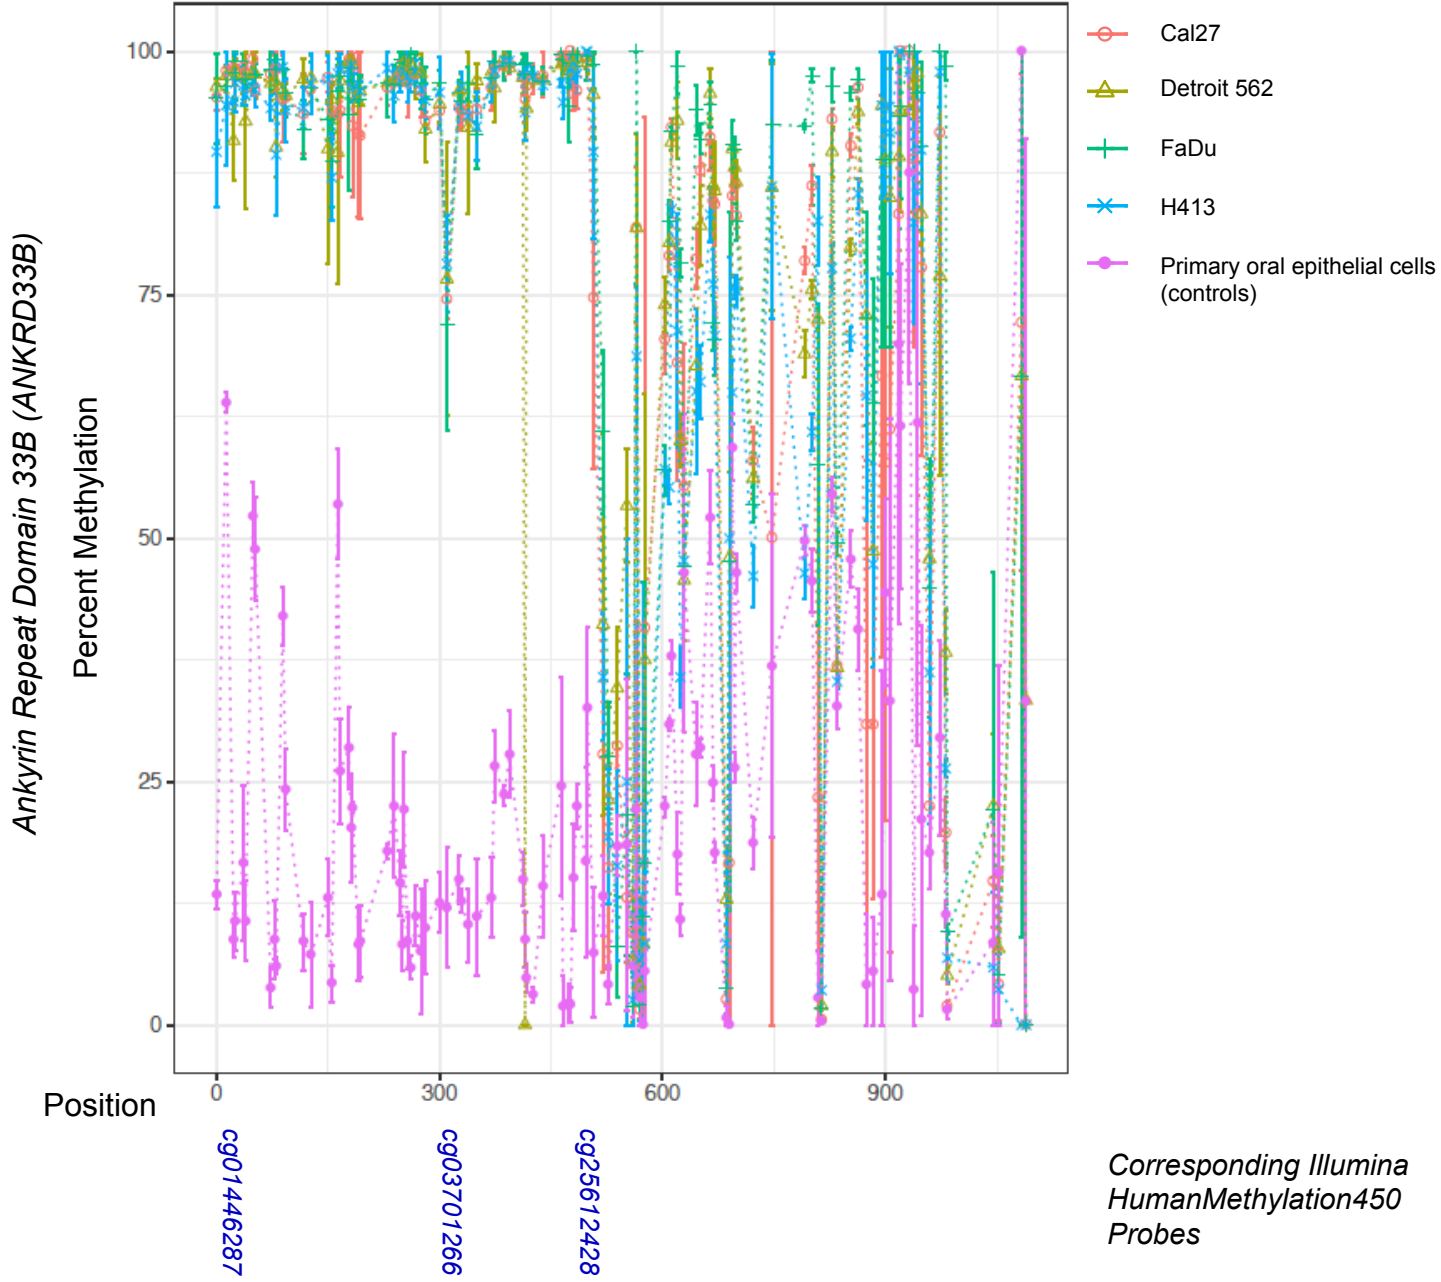

chr16:85998896-85999172(NCBI36/hg18)

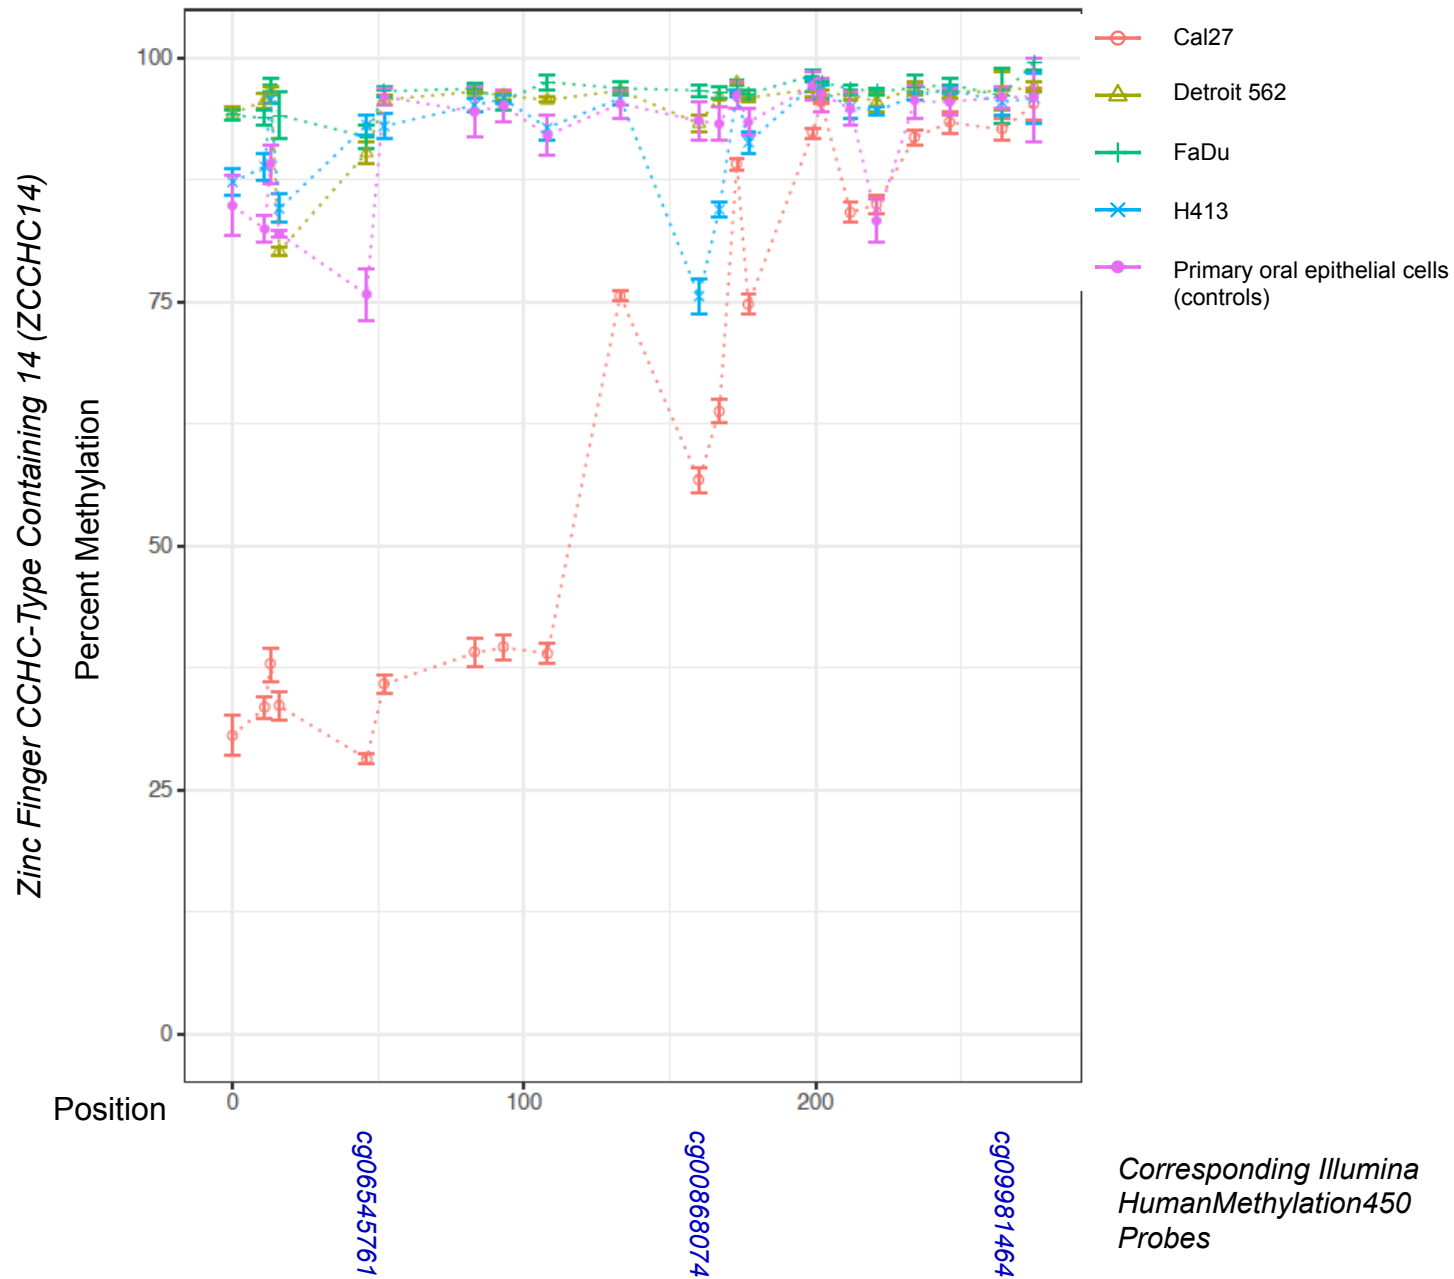

Corresponding Illumina HumanMethylation450 Probes

chr5:1010475-1010610(NCBI36/hg18)

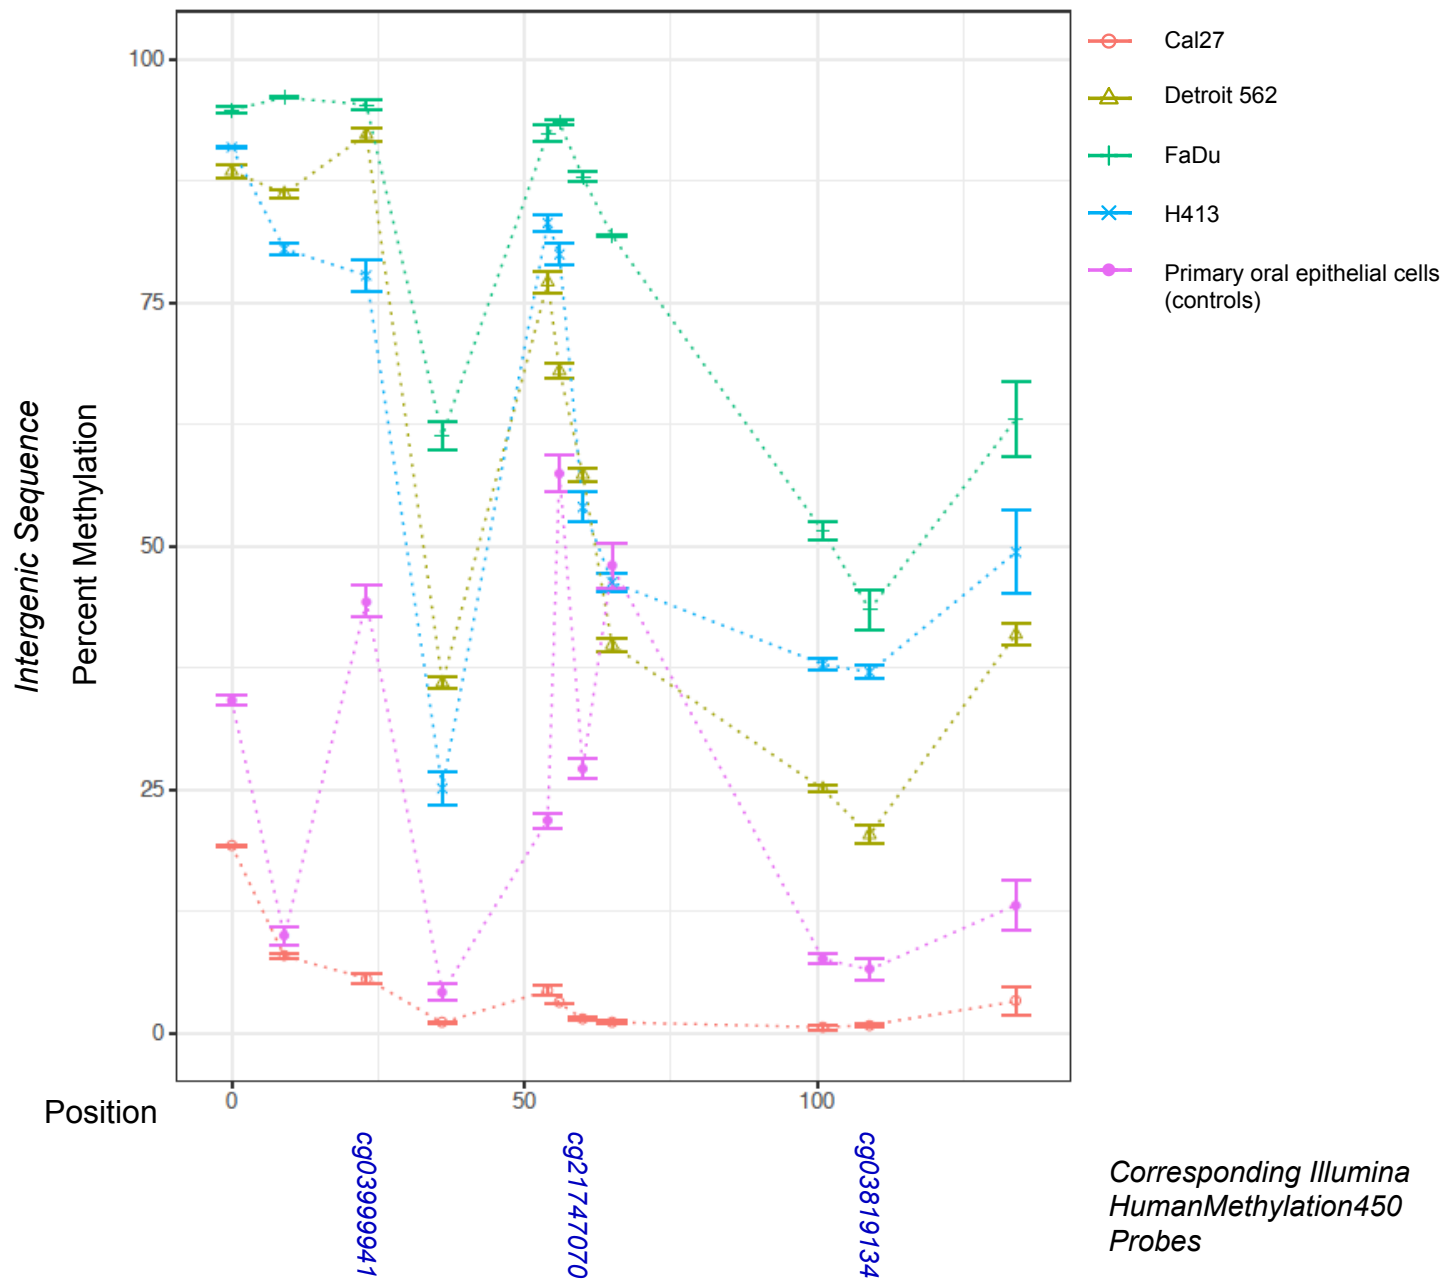

chr2:216945117-216945376(NCBI36/hg18)

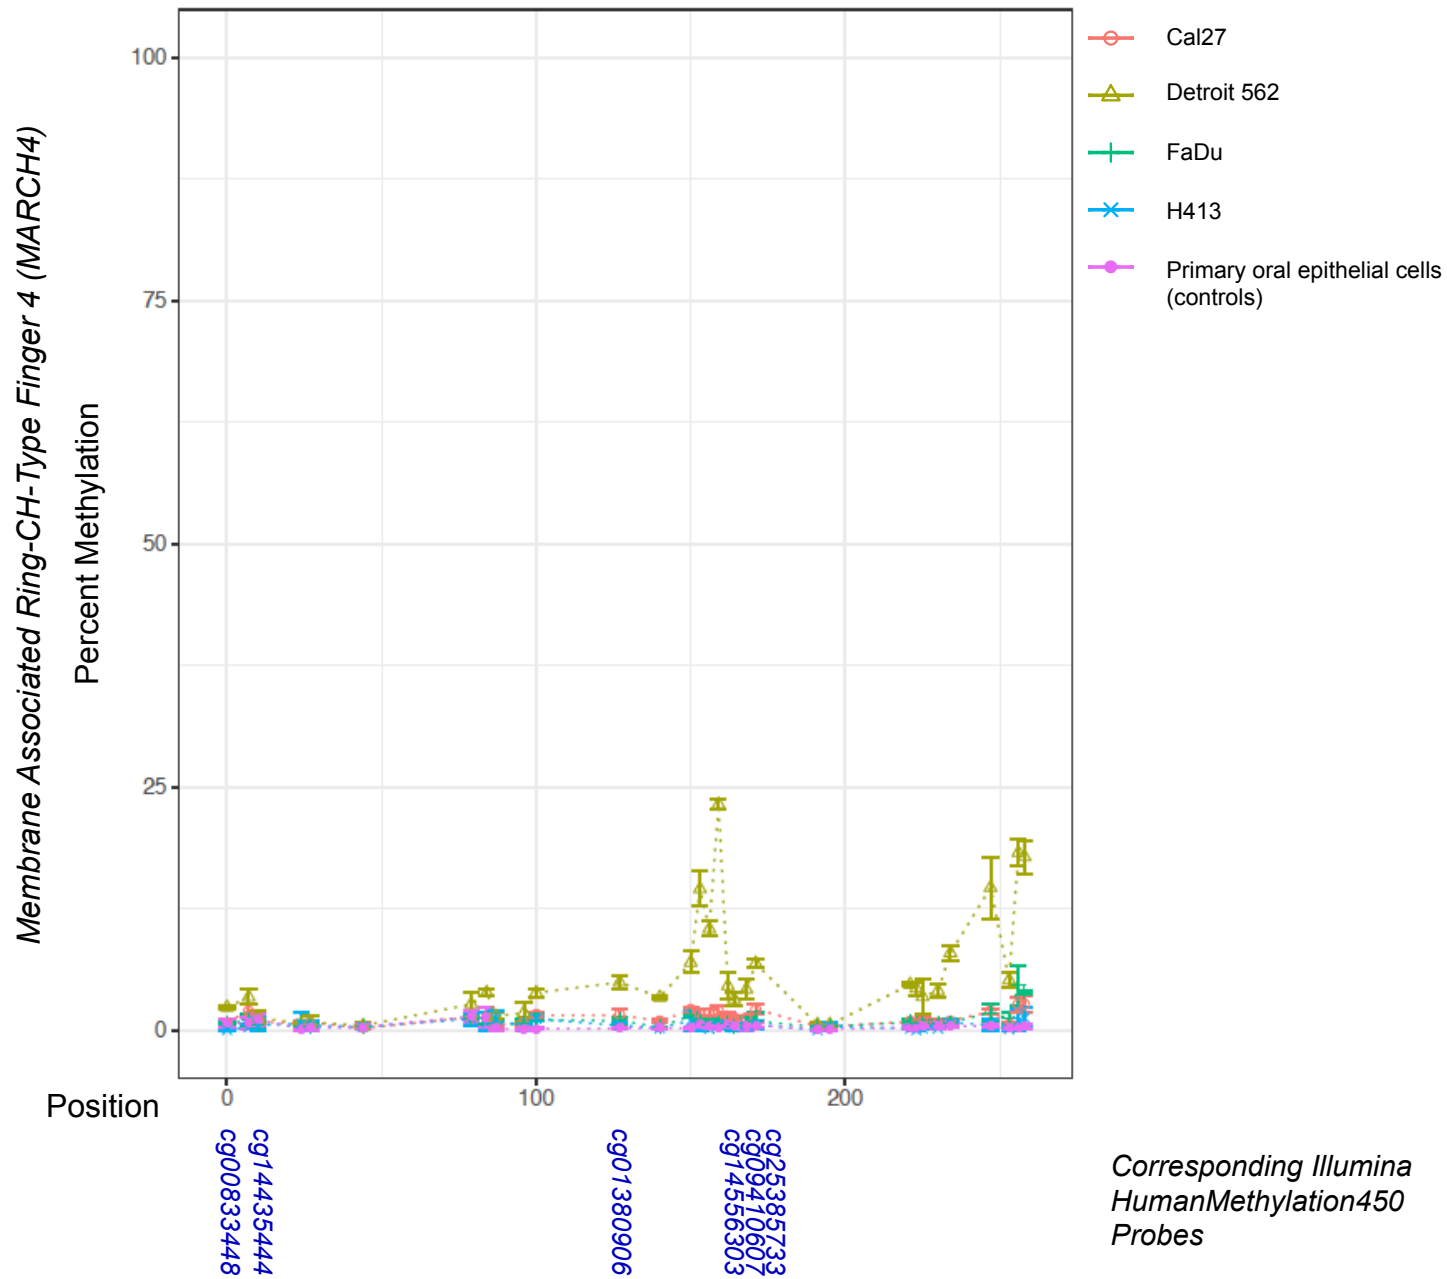

Supplement: epi-11-987-s2.pdf [file epi-11-987-s2.pdf]
