# Supplementary material
Source: PubMed Central journal article supplement (PMC7132784)
Supplement: epi-11-987-s1.pdf [file epi-11-987-s1.pdf]

(13) chr1:10818517-10818704 (NCBI36/hg18)  
Target13  
TTTCCCTTGGGGAGAAGCAGGAGTCCGGACCCCCAGCCCCACTCGCAGGAGGCAGTGGGCGGCTCCTCTCAGCCAGGCGGGTGAGGGTCTGTGCCGGCGGGGCATGCCACCAGCCAGGCAGGTGTGGAGCCCTCACAATGGTGCACCTGGCGTGGGCGTCAGGCCCTGCCCATTCAGCCCGGAACAATCACTGCTCTGCAGCCGCGCGCCACGCGGCTCCAGGGGCGGGAGGACCGCGGGCGGCAGAGCGGCAGATGGGCCTCGGGTGTCAAGTTTCCAGCTGGA  
GGAGGGG

(14) chr1:1385949-1386143 (NCBI36/hg18)  
Target14  
CCTGAGGGGGCTGAGGAGCACCTGTTCCCTGGGGACAGCTCGGC CGGCAGCCCCAGCGTTTCCCTCCCATCCCGCCC CGCAGATTATGCTGATCCTGGCCAGCTGCCACCCCGAGCAGTTCGACTGGGCCATCAATGCC  
TGCATCGACCTGATGGTCCACTTCGACCTGCCAGGGCAGGAGGAGCGGGCGCGCCTGGTGAAGTGTATCTTAAAGAGTATGTTCTTAAGCGGCCACAGAAGGAAAGCGTAAGTGTCCCGCCCCACCAGCCCCGCTCCAGG  
GGCCCTCGCTCAGGGTCCACCCCTGCTCCTGTTCTCCGGACACACCAGCAGGCCTGTCTCCAGGATGGG

(15) chr10:53743705-53744974 (NCBI36/hg18)  
Target15  
GAGGGCAAAAAGTGTCTTTGTCAGAGCCTATCACCCCTCGGCTCTGTAAAGTATTTAGATCGGATAATTAACCCCTTACTGCCAGGCAAGGGCACCCAAAGTCCAGAGTTCCTGCTGCCCGCTGCATTTATTAAGT  
CTGCTATAAAGCTCGCTGGTAGCCTTACCCTCGAAGGTGAGCCGGCCAGCCGAGCGACTAAGCAAGGGAGGGGCGGGGTGAAGAGTGTCAAAGGCCCCCTTTCATGTACACAAACACACCCCTCCAGCCCTCCAGCGC  
TTTGAATCCCATCCCGGCTTTGTTGTCTCCCTCCCAAGGGGCGGAATGCTCGGGCCCGCGGTATAAAGGCAGCCGCGGTGGCGGTGGCGGCAGAGCTCTGTGCTCCCTGCAGTCAGGACTCTGGGACCGCAGGGGGCT  
CCCGACCTGACTTGCAGCCGAACCGGCACGGTTTCTGGGGACCCAGGCTTGCAAGTGAAGGTCATTTCTCTTTCTTCTCCCTCTTGTAGTCTTCTGAGATGATGGCTCTGGGCGCAGCGGGAGCTACC  
GGGTCTTGTGGATGGTAGCGCGGCTCTCGCGGCCACCTCTGCTGGGAGTGAGCGCCACCTTGAACCTCGGTTCTCAATTCCAAAGCTATCAAGAACCTGCCCCACCGCTGGGCGCGCTGCGGGGCACCCAGGCTCTGCAGTCA  
GCGCCGCGCCGGAATCCTGTACC CGGGCGGGAATAAGTACCAGCCAT TGACAACCTACCAGGTGAGAGGGGTCGGGCACCTCAGAGGATGCTCTGACCTTGAAGGGTCCCTATCTGGAGA CGAGGAGTAGAACCGTGCTGAAT  
GTGTGCGGTTCAAGGAGCATTTGGTAACCTGCATTTGGGAGCAGTGGGCAGTAACAGGTTTGGAGAGGTGGACAGATAAGGACTGTGATCAGCGCCCGGGTCCAAGAGGGCGGGTACCTGGAAGCTCTGGGTGCCTCACCCCT  
CTCCCGAACCTTCCACAGCCGTACC CGTGCGCAGAGGACGAGGAGTGGGCCTGATGAGTACTGCGCTAGTCCCACC CGCGGAGGGGACCGCAGGCGTGCAATCTGTCTCGCTGCAGGAAGCGCCGAAAAAGCTGCAT  
GCGTCAAGCTATGTGCTGCCCGGGAAATTAAGTGAATAAAGTGGTGAAGTCTCTG

(16) chr11:20588323-20588561 (NCBI36/hg18)  
Target16  
GGAGAATGACTAGTCTGTGCCCTGTCAAGTGAGACCAGCGGCTTTAAGTGAATAAAGTGGAGCTAGCTGGGTCAAGTAAATAGGAACAACATAAATATCATTTCTATTTCCGGAATGGCTTCATTTTCACTTATAACTTTTAAAT  
AAATGATTCCTTTTCTCCCTGGTCTTTTCATGTGCTTTTCATTTAATAAATGCCCCAAGTAAAGAGAATCCATTCACAGCTTCCAATTTAGCAAGATCATTATCGCTGTTCTTTGTTGGGGTTGCTGGGCGCAGAGCTC  
TCTGATGAGATGGCCATCATTTCCCTCGCGGGTGGACC CGAAGGCTCGGGCGCTGGGAAGCATGCTCCTGCGCCCGTGGTGGGAGGGATATTCAGGAGGCTTGGGGCTGCGGAGCGAGCGAGCGGGGAGCCTGGGAAC  
CCTGCTGCATGCTGCAGGAACGGTGACCTTGTGCTGCTCGGCGGCAGTGCATACAGACATCCAGAGAAGCTCTCTAGTGAGGCTGCCTGCGTGCTTACAATGCAACTTGGGAATCGAGAGATTTGGTGTTCCTCCCTG  
TGTTAGTGATCTCTCCGCTCTTGGGTGGAAGTAATGTTTGGCAGGAGGGCTAGAAATAACTTATGTG

(17) chr10:134210902-134211265 (NCBI36/hg18)  
Target17  
TCCCACCTTGCATGGTGGCTCAGGGTGGTCAAGGAGGGCGTGGCTGTACATGGTTTCTGGACTGTAGCCCTTTGGGCTGAGTGAGGCGTACTGCCATCAGGGGTCCCTGGAGGGGCTCTCTCCATCCTCTTCTGGCGTCA  
GGTGTCTCGCGGCCTCTCGGTAAACAGCTGGCCTTTGCTTCTGTGCGGGCGCGTGGCCAGGCTGAGCAGTGCCTCGGCTGCCTAGGTGGTGTGAGGTTCTGTGAGCCCGGGCCAGCTGCCGCTGGTGAATATAACCGG  
GAGGGATGCCCGCCTCTGCCACCTGCTGGCATCTGGGGTTCCCGGGAGGCGGGCACCTGCACCTCGCGCTCGCCCTGGGCTGACCTCCATCTCCTCTCTTCTTACCCTAAGCGCCGTGGCTGAACAGGACTTGGTT  
TTTACGGCCTTCATGCCCTCAGCTTGGGGCTCTTTTTCAAAGGGTTCTCCGCGGACCGCTCGCCTAGGCAAGCAGGGTTTCTCCTTCAAGGACAGCCCGCGTGCCCCAGCCCTGTGACCGCGCTCTTGGTACTCACC  
AAGTGAAGTCCCA

(18) chr5:10702368-10703458 (NCBI36/hg18)  
Target18  
GCAGTCTGTTAGGAGCTTGGGGCCAGGGGTGGGGGTGGGGGCAGTTTTGCCTTTGCCAGGCTCTGCTGGGAGGGAAGAGTCTTGTGTGCCCGCCACCCTTCTGTTTGTGTTTTGCGTTTTGCAGGGGCGGATGTCCA  
CGCGAGGACCCCGCGTGGGATGTCCCGCAGGAGTGGCCACTTACACGGGCGCGTGGATGCCGCTCGTCTCATGCAGAGGCTGCTGGAGCGCCCTGCCCGAGCAGTTCTGGGAGAAGTACCGGCCCGAGCTGCCGCG  
CGCCCTGAAGCGCGCGGAAGCCCGCGGGCTCCAAGAAGTGCCTGCAGAGGCTCAGACTGCGTGTGCTCGTGTGCTGACCGCGCGCTCGTGTGGGGCCCGGAGGAAGGGGCGTCTGGACCACATGGTCCGGATGACC  
ACGACCTTACAGCCCGCGTGGCCATCGTGTGCCAGACCGTGTGCCCTGAGAGCCCTCCGAGCGTGGGGAAGAGGCGGCTGGCGGTGCAGGAGATCCTGGCGCGCGGGCTGCAGGGGCCCCAGGCGCAGGAGGAGGA  
TGAGGTGGGGGCGCGGGCAGCGCGGCGGACCGGACAGGAGGAAGCGGACTCCCGGGAGGGCTCCCGAGAGCCCGCCCTCCCTCCCGCCCTGGGGTCCCGGGGCCCGCAGCGCCCGCCCGCGGAAGGCCAGCCTCTGTC  
CCCTGCAGCCCGTGGGAGGAGCGGTCGCGCCCGGTGTGGTGGTGGCCCGGGTCCGAGTCAAGCAAGGCGCCCGCCACCTTCCAGCCCGAGCGCGCGGGAAGGGCAGCACCAGGACAGCGGCCACCTGCAGATC  
CCCAAGTGGCGGTACAAGGAGGCCAAGGAGGAGAAGGGAAGGCAGAGGAGGCGAAAAGAGCGCCAGGCGAGGCGCAGAAGGAGAGGCGCACTGCGCCCTGGAAGAAGAGGAGCTGAGGGCCCGTGTGCTGGCGTGGG  
GCGGGGCTGGGGCGGGGCGGGGCGCAGGGCTGGGCGCGGAGAAGGAGGCGGCCCGTTGCGCATCGCACCACTTCCGCTCCATGGACCAGGGGCTGCGCGCATTTCCAGGCTGTTGTCCAGGCTGCTTCCAAGAGAGG  
GCTGAGGGAGCCACATGGATTGCGTGTGCGCCAGCCCTCTAGCAATCAGTACACCTAGCGGGCACGTTGCTAAAGGCTCCCTTTAGAGAACCT

(19) chr16:85994896-85999172 (NCBI36/hg18)

Target19

ACTTTCAGGAAAATGACTAAGTACTTGAAAGGGTCAGTATGTTCTGTGTTTTTCAGATGAGGAAGTCTGATGACCGCAAAAAGCTCTTCAGACGCGCCGACCTTGGTGGCTTTTGGAGAGATGCATCCGAGCTCGCTGCTGGCA  
AACTCTCAAGTCCAAGTGTGCGGCTCCCTCCGGAAAGAGGCTCAAGGATGGGTGGTTCATTTTCTCTCGCTGTGTAGCTCCTACTTACAGCTGACGATTCTCGACTTCGGACGGCCTCCCTGGAGATGTACACGCGCC  
CATGCACGTTCAAGAAGACTGGCAGCTCCGAGAGGCCTTCGCTGCTGGGAACACAGCCGTGACAGTGTGGAACTCATCTACCTCAACGCTGAATGGCAGGCTCCAAGTTGAAA

(21) chr5:1010475-1010610 (NCBI36/hg18)

Target21

GGGGCCAAGAGAACCCTCAAAGGCTGAGGTCACCCCGCCAGGGTTCGGTTTAGGTGTGGCGCCTCCTCTGGAAGCCCTGGGATTGCCTGCGCGCCCGGCCCGGAGCTCCTGTTCCAAGCAGGGAGCATCCCTGGACCGTGCCC  
TCGTTCCCTTTGAGGTTTTCTGTGGCAGCACCACAGTTTAAATCGACTCACCCAGCCATGCTGGGGCTGGTTTTCTGTTAC

(22) chr2:216945117-216945376 (NCBI36/hg18)

Target22

GGCACTTGGCTCCAGCTTGGTCCTCGCGACTCCCCAAAACCGTATATAAATATATCTCTATAAAAAGCCGAGAGGAAGCAAATCAGATTCCAGGCTGCTGCCAGGTGTTGTCTCGTCTTCCGCGTTGCTCAGCACCCGCGGC  
TGCCCCACTGGCTCGATTCCCAAAGGGGTGGTGTGGAAGGGAGGTGGCGGGGCGGCGAGCTGACCGTCCGAGAACTGGAAACAAGGTTCTTGAGCGAGGGAGGCTCTCGGCTATCTCCGCCGCGCGCGCGCGCGCGCG  
CTGCTGCATTCAGCACCCCGGGGAGTGGACAGTCCCACCCAGACCCCGCGCGTCAAGCTCGTGGGGGCTGACGCAGACGCGCGGAGGGATGGAGGAGGAAAGGGGATGAGAGGAAAAGAAGCTGGAGGGAGAGGGAGC  
AAGAGGAGGAGAGAACTGTGCGAGGGAAGGGGATGGGGAGGGACCAAGGAAAGGGAGGTAACCA
